# Supplementary material for: Design, Development and Construct Validation of the Children’s Dietary Inflammatory Index
Source: MDPI journal article supplement (doi:10.3390/nu10080993), 2018-07-30
Supplement: s1 [file s1]

Supplementary Table 1: Food Parameters available in different countries

| Countries            | N    | Vit A | Vit B <sub>1</sub> | Vit B <sub>2</sub> | Vit B <sub>3</sub> | Vit B <sub>6</sub> | Folic Acid | Vit B <sub>12</sub> | Vit D | Vit C | Vit E | Beta Carotene | Energy | Carbs | Fiber | T. Fat | Sat Fat | MUF A | PUF A | Cholesterol | Protein | Alcohol | Fe | Mg | Se | Zn |
|----------------------|------|-------|--------------------|--------------------|--------------------|--------------------|------------|---------------------|-------|-------|-------|---------------|--------|-------|-------|--------|---------|-------|-------|-------------|---------|---------|----|----|----|----|
| USA                  | 8127 | x     | x                  | x                  | x                  | x                  | x          | x                   | x     | x     | x     | x             | x      |       |       |        | x       |       |       | x           | x       | x       | x  | x  | x  | x  |
| Australia            | 400  | x     | x                  | x                  | x                  |                    | x          |                     | x     | x     | x     |               | x      | x     | x     | x      | x       | x     | x     | x           | x       |         | x  | x  |    | x  |
| Japan                | 620  | x     | x                  | x                  | x                  | x                  | x          | x                   | x     | x     | x     |               | x      | x     | x     | x      | x       | x     |       | x           | x       | x       | x  | x  |    | x  |
| Korea                | 824  | x     |                    | x                  | x                  |                    |            |                     |       | x     |       | x             | x      | x     | x     | x      | x       | x     | x     |             | x       |         | x  |    |    |    |
| South Africa         | 157  |       | x                  | x                  |                    | x                  | x          | x                   |       |       |       |               |        |       | x     | x      |         | x     | x     | x           | x       |         | x  | x  | x  | x  |
| Venezuela            | 92   |       |                    |                    |                    |                    |            |                     |       |       |       |               | x      | x     |       | x      |         |       |       |             | x       |         |    |    |    |    |
| Spain                | 125  | x     | x                  | x                  | x                  | x                  | x          | x                   | x     | x     | x     |               | x      | x     | x     |        |         |       |       |             |         |         |    |    |    |    |
| Belgium              | 99   | x     | x                  | x                  | x                  | x                  | x          | x                   | x     | x     | x     |               | x      | x     | x     |        |         |       |       |             |         |         |    |    |    |    |
| Greece               | 172  | x     | x                  | x                  | x                  | x                  | x          | x                   | x     | x     | x     |               | x      | x     | x     |        |         |       |       |             |         |         |    |    |    |    |
| Germany              | 140  | x     | x                  | x                  | x                  | x                  | x          | x                   | x     | x     | x     |               | x      | x     | x     |        |         |       |       |             |         |         |    |    |    |    |
| France               | 107  | x     | x                  | x                  | x                  | x                  | x          | x                   | x     | x     | x     |               | x      | x     | x     |        |         |       |       |             |         |         |    |    |    |    |
| Italy                | 73   | x     | x                  | x                  | x                  | x                  | x          | x                   | x     | x     | x     |               | x      | x     | x     |        |         |       |       |             |         |         |    |    |    |    |
| Sweden               | 102  | x     | x                  | x                  | x                  | x                  | x          | x                   | x     | x     | x     |               | x      | x     | x     |        |         |       |       |             |         |         |    |    |    |    |
| Austria              | 128  | x     | x                  | x                  | x                  | x                  | x          | x                   | x     | x     | x     |               | x      | x     | x     |        |         |       |       |             |         |         |    |    |    |    |
| United Arab Emirates | 358  | x     | x                  | x                  | x                  | x                  | x          | x                   | x     | x     | x     |               |        |       | x     |        |         |       |       | x           |         |         | x  | x  |    | x  |
| Chile                | 1543 |       |                    |                    |                    |                    |            |                     |       |       |       |               | x      | x     | x     | x      | x       | x     | x     | x           | x       |         |    |    |    |    |

**Supplementary Table 2:** Shows the quantile regression coefficients for children's Dietary Inflammatory Index treated categorically with 3 levels (level 1 is the reference level) adjusted for sex, age, race, and BMI, NHANES, 2005–2012.

|                           | Weighted CRP Levels |       |                 |                 |       |                |                 |       |                |                 |       |                 |
|---------------------------|---------------------|-------|-----------------|-----------------|-------|----------------|-----------------|-------|----------------|-----------------|-------|-----------------|
|                           | 25th percentile     |       |                 | 50th percentile |       |                | 75th percentile |       |                | 90th percentile |       |                 |
|                           | Est.                | SE    | 95% CI          | Est.            | SE    | 95% CI         | Est.            | SE    | 95% CI         | Est.            | SE    | 95% CI          |
| <b>CDII Level</b>         |                     |       |                 |                 |       |                |                 |       |                |                 |       |                 |
| <b>Quartile 2</b>         | 0.018               | 0.011 | [-0.003, 0.039] | †0.060          | 0.022 | [0.018, 0.102] | †0.109          | 0.050 | [0.011, 0.206] | 0.323           | 0.323 | [-0.131, 0.777] |
| <b>Quartile 3 (3 + 4)</b> | 0.012               | 0.009 | [-0.006, 0.030] | †0.062          | 0.026 | [0.010, 0.113] | †0.123          | 0.034 | [0.057, 0.189] | †0.25           | 0.115 | [0.025, 0.475]  |

The quantile regression coefficients (Est.), standard errors (SE) and 95% confidence intervals (CI). † Indicates a significant value (at  $\alpha = 0.05$ ).
